# Supplementary material
Source: publisher site journal article supplement (https://www.kjim.org/upload/media/kjim-2022-104-suppl3.pdf)
Supplement: Supplementary file 1 [file kjim-2022-104-suppl3.pdf]

**Supplementary Table 3. Patient satisfaction with symptom reduction at 4 days and 7 days after medication between experimental drug (DW1601) and control (DW16011 or *Pelargonium sidoides*)**

| Variable          | DW1601 (n = 67) | DW16011 (n = 70) | <i>P. sidoides</i> (n = 64) | <i>p</i> value <sup>a</sup> | <i>p</i> value <sup>b</sup> |
|-------------------|-----------------|------------------|-----------------------------|-----------------------------|-----------------------------|
| At 4 days         | 66              | 68               | 64                          |                             |                             |
| Very satisfied    | 10 (15.2)       | 3 (4.4)          | 5 (7.8)                     | 0.002 <sup>a</sup>          | 0.031 <sup>a</sup>          |
| Satisfied         | 40 (60.6)       | 28 (41.2)        | 28 (43.8)                   |                             |                             |
| Neutral           | 14 (21.2)       | 29 (42.7)        | 25 (39.1)                   |                             |                             |
| Dissatisfied      | 2 (3.0)         | 8 (11.8)         | 6 (9.4)                     |                             |                             |
| Very dissatisfied | 0               | 0                | 0                           |                             |                             |
| At 7 days         | 67              | 70               | 64                          |                             |                             |
| Very satisfied    | 28 (41.8)       | 23 (32.9)        | 23 (35.9)                   | 0.392                       | 0.138                       |
| Satisfied         | 34 (50.8)       | 35 (50.0)        | 29 (45.3)                   |                             |                             |
| Neutral           | 5 (7.5)         | 10 (14.3)        | 8 (12.5)                    |                             |                             |
| Dissatisfied      | 0               | 1 (1.4)          | 4 (6.3)                     |                             |                             |
| Very dissatisfied | 0               | 1 (1.4)          | 0                           |                             |                             |

Values are presented as number (%). Patient satisfaction for symptom reduction was classified into 5 categories of very satisfied, satisfied, neutral, dissatisfied, and very dissatisfied and was investigated using self-report form.

<sup>a</sup>*p* value was calculated using Pearson's chi-square test for the difference of score between DW1601 and DW16011 groups.

<sup>b</sup>*p* value was calculated using Pearson's chi-square test for the difference of score between DW1601 and *P. sidoides* groups.
